# Supplementary material
Source: ML conference proceedings conference paper supplement (https://openreview.net/forum?id=f43lpq1Q8i)
Supplement: supplementary_material [file iclr2026_conferenceAppendix.pdf › iclr2026_conferenceAppendix.pdf]

## A MOLECULES PREPARATION

Unless otherwise stated we use RDKit (Landrum, 2013) (version 2025.03.4), Dimorphite-DL (Ropp et al., 2019) (version 2.0.2), and AiZynthFinder (Genheden et al., 2020) (version 4.4.0). To compare models faithfully, we use the preprocessing pipeline. Each model was asked to generate 10,000 unique and valid molecules, and validity was checked with RDKit. After that each molecule was standardized with RDKit and Dimorphite-DL, following these steps below.

```

from rdkit import Chem
from rdkit.Chem import AllChem
from rdkit.Chem.SaltRemover import SaltRemover
from rdkit.Chem.MolStandardize import tautomer, rdMolStandardize
from rdkit.Chem.EnumerateStereoisomers import EnumerateStereoisomers, StereoEnumerationOptions
from dimorphite_dl import protonate_smiles

mol = Chem.MolFromSmiles("CNCC/C=N/[C@H]1CCc2ccccc21")

# (i) Remove salts or solvents and keep largest organic fragment
remover = SaltRemover()
mol = remover.StripMol(mol)
mol = rdMolStandardize.LargestFragmentChooser(preferOrganic=True).choose(mol)

# (ii) Add hydrogens to complete valences
mol = Chem.AddHs(mol)

# (iii) Normalize valence, kekulize, and sanitize
mol = rdMolStandardize.Normalize(mol)
Chem.Kekulize(mol, clearAromaticFlags=True)
Chem.SanitizeMol(mol)

# (iv) Protomer enumeration at pH 7.4 ± 0.0
smiles = Chem.MolToSmiles(mol)
protomers = protonate_smiles(smiles, ph_min=7.4, ph_max=7.4, max_variants=8)

# (v) Preserve declared stereochemistry
# and, where unspecified, enumerate stereocenters under a cap
cap = 8
opts = StereoEnumerationOptions(onlyUnassigned=True, maxIsomers=cap)
stereo_variants = []
for p in protomers:
    group = []
    for t in p:
        Chem.AssignStereochemistry(t, cleanIt=True, force=True)
        group.extend(list(EnumerateStereoisomers(t, options=opts)))
    stereo_variants.append(group)

# (vi) Generate 3D conformers via distance geometry
# and minimize with a small-molecule force field,
# and retain the lowest-energy conformer per state
def lowestE_conf(m):
    params = AllChem.ETKDGv3()
    cids = AllChem.EmbedMultipleConfs(m, numConfs=20, params=params)
    mmff_props = AllChem.MMFFGetMoleculeProperties(m, mmffVariant='MMFF94')
    if mmff_props: results = AllChem.MMFFOptimizeMoleculeConfs(m)
    else: results = AllChem.UFFOptimizeMoleculeConfs(m)

    energies = [e for (_, e) in results]
    best_idx = min(range(len(energies)), key=lambda i: energies[i])
    best_cid = cids[best_idx]
    best = Chem.Mol(m)
    best.RemoveAllConformers()
    best.AddConformer(m.GetConformer(best_cid), assignId=True)
    return best, energies[best_idx]

# Select the lowest-energy conformer
final_states = []
for variants in stereo_variants:
    for iso in variants:
        iso = Chem.AddHs(iso, addCoords=True)
        best3d = lowestE_conf(iso)
        final_states.append(best3d)
final_states.sort(key=lambda x: x[1])

# Result
best_mol, best_energy = final_states[0]

```

## B DETAILED MOLECULAR FLOW WITHIN FIVE-STAGE FILTERING PIPELINE

### B.1 DESCRIPTORS DEFINITIONS AND THRESHOLDS

Unless otherwise stated we use RDKit (Landrum, 2013) (version 2025.03.4). This section extends Descriptors 3.1 in the main paper. All descriptors are computed after the ligand-preparation stage. We compute 18 physicochemical descriptors which are all two-dimensional with no 3D dependence

using RDKit and apply literature-based thresholds to remove chemically out-of-scope candidates while retaining structural diversity.

The descriptor panel includes: allowed elements ("Chars"), number of atoms (#atoms), number of heavy atoms (#heavy atoms), number of hetero atoms (#hetero atoms), number of nitrogen atoms (#Nitrogen atoms), molecular weight (MW), logP, ring size, number of rings (#rings), number of aromatic rings (#aroma rings), number of fused aromatic rings (#fused aroma rings), number of rigid bonds (#rigid bonds), number of rotatable bonds (#RotB), hydrogen bond donors (HBDs), hydrogen bond acceptors (HBAs),  $f_{sp^3}$ , topological polar surface area (TPSA), quantitative estimation of drug-likeness (QED).

Our bounds are based on established medicinal chemistry rule sets and surveys, reflecting realistic constraints. Mostly we have relied on: the Rule-of-Five (Lipinski et al., 1997), the Beyond Rule-of-Five (Doak et al., 2014), Rule-of-Xu (Xu & Stevenson, 2000), Oprea rule (Oprea et al., 2001), Veber's Rules (Veber et al., 2002), ZINC subset filters (Irwin & Shoichet 2005; Irwin et al., 2012), Generative Design choices based on a review of generative chemistry methods (Warr et al., 2022), QED thresholds based on main paper (Bickerton et al., 2012), and "Escape from Flatland" (Lovering et al., 2009). Descriptive surveys (Heravi & Zadsirjan, 2020; Shearer et al., 2022; Vitaku et al., 2014) are used for guiding toward realistic constraints on those descriptors, that are not presented in rule sets above. We combined and extended rule sets and surveys because (i) no single rule covers all descriptors we use, and (ii) our goal is a general, non-task-specific clean-up to avoid clearly out-of-scope chemistry rather than aggressive optimization for a specific ADME profile.

We restrict to the common small-molecule drug alphabet {C, H, N, O, S, F, Cl, Br}, following common ZINC database Filters (Irwin & Shoichet, 2005; Irwin et al., 2012) and surveys of approved drugs (Irwin et al., 2012; Vitaku et al., 2014; Heravi & Zadsirjan, 2020); heavy metals are excluded. Number of hetero atoms lower bound is set to 2, as this prevents trivial all-carbon hydrocarbons from passing the filter (although such molecules are synthetically valid, they are essentially outside the space of relevant chemotypes). We follow descriptive surveys reporting that nearly all oral drugs contain between 0 and 10 nitrogen atoms (Vitaku et al., 2014; Shearer et al., 2022). The original Oprea rule (Oprea et al., 2001) sets a lower bound of 2 for HBAs, but we set this to  $\geq 3$  to exclude hydrophobic candidates lacking sufficient polarity. Molecules with  $f_{sp^3} \geq 0.25$  are known to exhibit improved three-dimensionality and associated with better synthesisability metrics, following the "Escape from Flatland" hypothesis (Lovering et al., 2009) we use a permissive lower bound of 0.15. Molecules with very low QED values ( $< 0.3$ ) are strongly enriched for exotic, non-druglike structures (Bickerton et al., 2012).

```
from rdkit import Chem
from rdkit.Chem import Lipinski, rdMolDescriptors, QED, Descriptors
from medchem.rules._utils import n_fused_aromatic_rings

mol = Chem.MolFromSmiles(smiles)

chars = list(set(atom.GetSymbol() for atom in mol.GetAtoms() if atom.GetSymbol())) # --> ZINC Filters
n_atoms = Chem.AddHs(mol).GetNumAtoms() # --> ZINC Filters
n_heavy_atoms = rdMolDescriptors.CalcNumHeavyAtoms(mol) # --> Rule-of-Xu
n_het_atoms = sum(1 for atom in mol.GetAtoms() if atom.GetAtomicNum() not in (1, 6)) # --> Generative Design
n_n_atoms = sum(1 for atom in mol.GetAtoms() if atom.GetAtomicNum() == 7) # --> Descriptive surveys
molWt = Descriptors.MolWt(mol) # --> Beyond Rule-of-Five
logP = Descriptors.MolLogP(mol) # --> Beyond Rule-of-Five
rings_size = [len(x) for x in mol.GetRingInfo().AtomRings()] # upper bound --> ZINC Filters
n_rings = mol.GetRingInfo().NumRings() # --> extended ZINC Filters
n_aroma_rings = rdMolDescriptors.CalcNumAromaticRings(mol) # --> Generative Design
n_fused_aromatic_rings = n_fused_aromatic_rings(mol) # --> Generative Design
n_rigid_bonds = mol.GetNumBonds() - rdMolDescriptors.CalcNumRotatableBonds(mol) # --> Generative Design
n_rot_bonds = rdMolDescriptors.CalcNumRotatableBonds(mol) # --> Oprea Rule
hbds = Lipinski.NumHDonors(mol) # --> Rule-of-Five
hbas = Lipinski.NumHAcceptors(mol) # upper bound --> Generative Design, lower bound --> extended Rule of Oprea
fsp3 = rdMolDescriptors.CalcFractionCSP3(mol) # --> Extended "Escape from Flatland"
tpsa = rdMolDescriptors.CalcTPSA(mol) # upper bound --> Veber's Rules, lower bound --> Generative Design
qed = QED.qed(mol) # --> Unfavorable acc. to QED paper
```

Each cell in Table 5, Table 6 and Table 7 reports the number of generated molecules that satisfy the corresponding descriptor threshold (bold = best, underline = second best). "Pass" counts molecules meeting all thresholds simultaneously. Figure 3 shows the descriptor distributions for the three model families alongside those of known inhibitors.

While rule-based filtering is useful for triaging large generative samples, it is not definitive. Notably, some known KRAS G12D inhibitors fall outside predefined boundaries. We therefore treat molecule generation filtering as an early stage of exploration. Molecules that pass filters are good starting

points. During later stages of hit identification and lead optimization added rigidity, new polar groups, or increased molecular weight often improve potency and selectivity, even if such changes reduce formal drug-likeness by classical rules (Schneider & Fechner, 2010; Hughes et al., 2011). This reflects the inherent trade-offs of medicinal chemistry.

Notably, known inhibitors violate some of these rules, as bioactivity does not follow the strict compliance with rules (Doak et al., 2014).

Table 5: Comparison of unconditional molecular generators by descriptor pass rates

| Metric              | Threshold                    | E(3)DM       | HIERGRAPHVAE | JT-VAE       | MoLeR        | MOLGPT       | TGM-DLM      |
|---------------------|------------------------------|--------------|--------------|--------------|--------------|--------------|--------------|
| <b>Initial</b>      |                              | <b>10000</b> | <b>10000</b> | <b>10000</b> | <b>10000</b> | <b>10000</b> | <b>10000</b> |
| Chars               | $[C, N, S, O, F, Cl, Br, H]$ | <b>9982</b>  | 9879         | 9910         | 9716         | 9860         | 8178         |
| #atoms              | [10, 100]                    | <b>9999</b>  | 9961         | 9996         | 9978         | 9982         | 8430         |
| #heavy atoms        | [10, 50]                     | 9658         | 9687         | 9963         | 9921         | <b>9993</b>  | 8211         |
| #hetero atoms       | [2, 15]                      | 9774         | 9757         | 9982         | 9902         | <b>9985</b>  | 8182         |
| #Nitrogen atoms     | [0, 10]                      | 9973         | 9998         | <b>10000</b> | 9999         | <b>10000</b> | 9979         |
| MW                  | [100, 1000]                  | 9938         | 9954         | 9992         | 9992         | <b>10000</b> | 9394         |
| logP                | [-2, 10]                     | 9690         | 9974         | 9985         | 9982         | <b>10000</b> | 7986         |
| ring size           | [3, 12]                      | 9523         | <b>10000</b> | <b>10000</b> | 9995         | 9984         | 9884         |
| #rings              | [0, 8]                       | 9983         | 9971         | <b>9997</b>  | 9887         | 9872         | 9875         |
| #aroma rings        | [0, 5]                       | <b>10000</b> | 9979         | <b>10000</b> | 9925         | 9997         | 9994         |
| #fused aroma rings  | [0, 2]                       | <b>10000</b> | <b>10000</b> | <b>10000</b> | 9998         | <b>10000</b> | <b>10000</b> |
| #rigid bonds        | [0, 30]                      | 9687         | 9494         | <b>9968</b>  | 8299         | 8057         | 8477         |
| #RotB               | [2, 8]                       | 6848         | 8674         | <b>9836</b>  | 7260         | 8191         | 5023         |
| HBDs                | $\leq 5$                     | 9968         | 9975         | 9992         | 9913         | <b>10000</b> | 7978         |
| HBAs                | [3, 12]                      | 8549         | 7047         | <b>9043</b>  | 8821         | 8914         | 6395         |
| $f_{sp^3}$          | [0.15, 0.8]                  | 8145         | 7199         | <b>9278</b>  | 7611         | 7790         | 5977         |
| TPSA                | [40, 140]                    | 7799         | 7414         | <b>8700</b>  | 8089         | 8118         | 5550         |
| QED                 | [0.3, 1]                     | 8355         | 9530         | <b>9978</b>  | 8231         | 9041         | 5975         |
| <b>Pass Stage 1</b> |                              | <b>3520</b>  | <b>3579</b>  | <b>7586</b>  | <b>3193</b>  | <b>3474</b>  | <b>1216</b>  |

Table 6: Comparison of ligand-based molecular generators by descriptor pass rates

| Metric              | Threshold                    | GCPG         | GENTRL       | MOLFINDER    | PGMG         | REINVENT4 (V) | REINVENT4 (P) | REINVENT4 (TL) |
|---------------------|------------------------------|--------------|--------------|--------------|--------------|---------------|---------------|----------------|
| <b>Initial</b>      |                              | <b>10000</b> | <b>10000</b> | <b>10000</b> | <b>10000</b> | <b>10000</b>  | <b>10000</b>  | <b>10000</b>   |
| Chars               | $[C, N, S, O, F, Cl, Br, H]$ | <b>10000</b> | 9999         | 9469         | <b>10000</b> | <b>10000</b>  | <b>10000</b>  | 9999           |
| #atoms              | [10, 100]                    | <b>10000</b> | <b>10000</b> | 9995         | 9972         | 9953          | <b>10000</b>  | 9914           |
| #heavy atoms        | [10, 50]                     | <b>10000</b> | <b>10000</b> | 9930         | 9945         | 9933          | <b>10000</b>  | 9717           |
| #hetero atoms       | [2, 15]                      | <b>10000</b> | <b>10000</b> | 9742         | 9984         | 9917          | 9996          | 9910           |
| #Nitrogen atoms     | [0, 10]                      | <b>10000</b> | <b>10000</b> | 9998         | 9870         | 9997          | 9990          | 9979           |
| MW                  | [100, 1000]                  | <b>10000</b> | <b>10000</b> | 9983         | 9998         | 9996          | <b>10000</b>  | 9988           |
| logP                | [-2, 10]                     | <b>10000</b> | <b>10000</b> | 9999         | 9958         | 9965          | <b>10000</b>  | 9999           |
| ring size           | [3, 12]                      | <b>10000</b> | 9980         | 9972         | <b>10000</b> | <b>10000</b>  | <b>10000</b>  | 9953           |
| #rings              | [0, 8]                       | 9670         | <b>10000</b> | 9221         | 7926         | 9872          | 7110          | 3703           |
| #aroma rings        | [0, 5]                       | 9999         | <b>10000</b> | 9998         | 5004         | 9949          | 9922          | 9821           |
| #fused aroma rings  | [0, 2]                       | <b>10000</b> | <b>10000</b> | 9998         | 8618         | 9997          | 9943          | 9884           |
| #rigid bonds        | [0, 30]                      | 6672         | <b>9988</b>  | 8528         | 833          | 8291          | 988           | 2198           |
| #RotB               | [2, 8]                       | <b>10000</b> | 6367         | 9744         | 9562         | 8136          | 9793          | 9079           |
| HBDs                | $\leq 5$                     | <b>10000</b> | <b>10000</b> | <b>10000</b> | 8988         | 9900          | <b>10000</b>  | 9987           |
| HBAs                | [3, 12]                      | 9980         | 9950         | 5562         | 9725         | 8999          | <b>9995</b>   | 9600           |
| $f_{sp^3}$          | [0.15, 0.8]                  | <b>9999</b>  | 9992         | 8987         | 3371         | 7667          | 9949          | 9669           |
| TPSA                | [40, 140]                    | <b>9965</b>  | 9286         | 3643         | 8230         | 8317          | 9927          | 9356           |
| QED                 | [0.3, 1]                     | <b>10000</b> | 9838         | 9965         | 1951         | 8829          | 9384          | 7519           |
| <b>Pass Stage 1</b> |                              | <b>6616</b>  | <b>5669</b>  | <b>1592</b>  | <b>195</b>   | <b>4089</b>   | <b>936</b>    | <b>1204</b>    |

Table 7: Comparison of protein-based molecular generators by descriptor pass rates

| Metric              | Threshold                    | DIFFSBDD     | DRAGONFLY    | DRAGONFLY (B) | DRUGFLOW     | POCKET2MOL   | PROTOBIND-DIFF | RESGEN       | TARGETDIFF   |
|---------------------|------------------------------|--------------|--------------|---------------|--------------|--------------|----------------|--------------|--------------|
| <b>Initial</b>      |                              | <b>10000</b> | <b>10000</b> | <b>10000</b>  | <b>10000</b> | <b>10000</b> | <b>10000</b>   | <b>10000</b> | <b>10000</b> |
| Chars               | $[C, N, S, O, F, Cl, Br, H]$ | 9618         | 9993         | <b>10000</b>  | 9308         | 9926         | 9991           | 9753         | 9707         |
| #atoms              | [10, 100]                    | 9961         | 9937         | <b>10000</b>  | 9929         | 9999         | 8023           | <b>10000</b> | 9952         |
| #heavy atoms        | [10, 50]                     | 9952         | 9947         | <b>10000</b>  | 9997         | 9977         | 7913           | 9812         | 9939         |
| #hetero atoms       | [2, 15]                      | 9868         | 9894         | <b>10000</b>  | 9992         | 9722         | 8537           | 9610         | 9725         |
| #Nitrogen atoms     | [0, 10]                      | <b>10000</b> | 9989         | 9998          | 9999         | <b>10000</b> | 9817           | 9991         | 9998         |
| MW                  | [100, 1000]                  | 9996         | <b>10000</b> | <b>10000</b>  | <b>10000</b> | 9992         | 8758           | 9984         | <b>10000</b> |
| logP                | [-2, 10]                     | 9934         | 9949         | <b>10000</b>  | 9997         | 9935         | 9895           | 9970         | 9623         |
| ring size           | [3, 12]                      | 9872         | <b>9995</b>  | 9989          | 9914         | 9610         | 8645           | 9485         | 9178         |
| #rings              | [0, 8]                       | 9863         | 9855         | 8734          | 9889         | 8849         | 7953           | 7655         | 9763         |
| #aroma rings        | [0, 5]                       | <b>10000</b> | 9928         | 9983          | 9996         | 9981         | 9892           | 9327         | <b>10000</b> |
| #fused aroma rings  | [0, 2]                       | <b>10000</b> | <b>10000</b> | 9994          | 9999         | <b>10000</b> | 9995           | 9991         | <b>10000</b> |
| #rigid bonds        | [0, 30]                      | 9054         | 5933         | 1069          | 8440         | 6175         | 2511           | 2731         | 6917         |
| #RotB               | [2, 8]                       | 6974         | 7675         | <b>9932</b>   | 9343         | 8094         | 7307           | 6853         | 7657         |
| HBDs                | $\leq 5$                     | 9556         | 9923         | <b>10000</b>  | 9931         | 9844         | 9763           | 9185         | 8062         |
| HBAs                | [3, 12]                      | 9079         | 9008         | <b>9991</b>   | 9727         | 7766         | 8517           | 9115         | 9526         |
| $f_{sp^3}$          | [0.15, 0.8]                  | 7308         | 8465         | <b>9991</b>   | 8390         | 8659         | 9672           | 8081         | 9048         |
| TPSA                | [40, 140]                    | 8108         | 8670         | <b>9981</b>   | 9343         | 7557         | 7689           | 6588         | 7006         |
| QED                 | [0.3, 1]                     | 7806         | 7779         | <b>9946</b>   | 9564         | 8492         | 6444           | 4958         | 7249         |
| <b>Pass Stage 1</b> |                              | <b>3665</b>  | <b>2779</b>  | <b>1022</b>   | <b>5464</b>  | <b>2657</b>  | <b>1466</b>    | <b>1080</b>  | <b>3444</b>  |

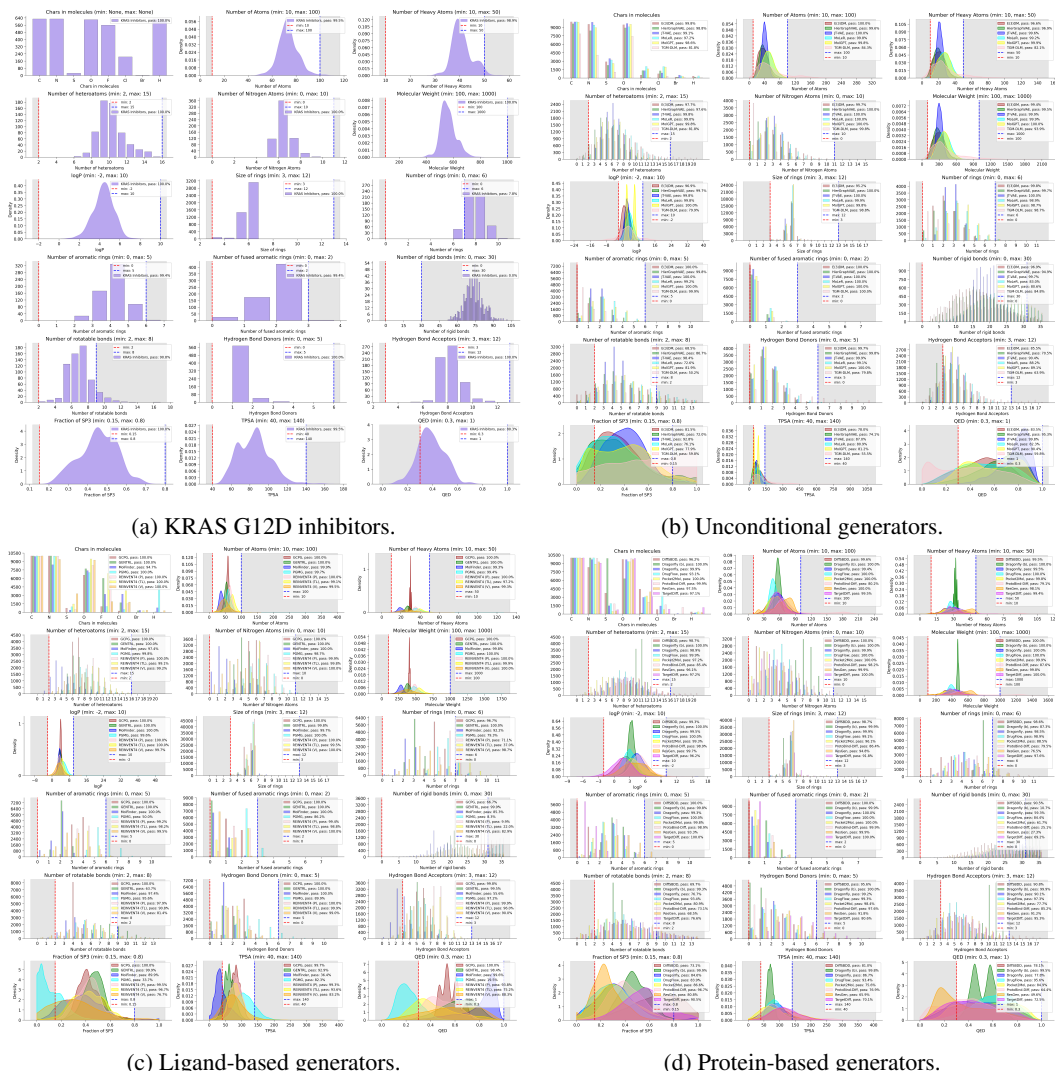

Figure 3: Physicochemical descriptor distributions for KRAS G12D inhibitors and generated molecules. Each panel shows the 18 descriptors used in Stage 1 filtering, comparing (a) known inhibitors, (b) unconditional generators, (c) ligand-based generators, and (d) protein-based generators. Dashed lines mark filtering thresholds, highlighting chemical space coverage and pass rates of different model families.

## B.2 STRUCTURE FILTERS DEFINITIONS AND THRESHOLDS

Unless otherwise stated we use MedChem (Emmanuel et al., 2025) 2.0.5. This section extends Structural Filters 3.2 in the main paper. All structural filters are computed after the descriptors stage on molecules that pass all descriptors simultaneously. We compute 5 structural rule sets using MedChem for the sake of removing those molecules that are toxic, reactivate, unstable, or harmful for a human.

- **CommonAlerts:** Aggregates public structural alert sets using MedChem; we use a subset of 15 alert sets to flag motifs linked to assay interference or liabilities; implemented in `medchem.structural.CommonAlertsFilters`. The following structural alert sets are used: University of Dundee NTD Screening Library Filters (Brenk et al., 2008), Bristol-Myers Squibb (BMS) HTS Deck Filters (Pearce et al., 2006), Inpharmatica (Emmanuel et al., 2025), LD50-Oral (Sushko et al., 2012), Glaxo Wellcome Hard Filters (Hann et al., 1999), Pan Assay Interference Compounds (PAINS) Filters (Baell & Hol-



loway, 2010), AlphaScreen frequent Hitters (Schorpp et al., 2014), Frequent-Hitter (Dahlin et al., 2021), Capuzzi et al., 2017, Dahlin et al., 2015), Chelator (Aldrich et al., 2017), SureChEMBL (Papadatos et al., 2016), NIH MLSMR Excluded Functionality Filters (Jadhav et al., 2010), Pfizer LINT filters (Blake, 2005), GST-Hitters (Schorpp et al., 2014), HIS-Hitters (Schorpp et al., 2014), LuciferaseInhibitor (Auld et al., 2008; Thorne et al., 2010).

- **MolGraphStatistics**: Removes graph-theoretic instabilities frequently produced by generative models (e.g., atoms participating in multiple 3–4 member rings); implemented in `medchem.functional.molecular_graph_filter`.
- **MolComplexity**: Excludes outliers by comparing complexity metrics with percentile thresholds computed on ZINC-15 reference set. The following rule sets are used: Bertz (Bertz, 1981), Whitlock (Whitlock, 1998), Barone (Barone & Chanon, 2001), Synthetic & Molecular Complexity (SMCM) (Allu & Oprea, 2005), Total Walk Count complexity (TWC) (Gutman et al., 2001), SAS (Ertl & Schuffenhauer, 2009), QED (Bickerton et al., 2012), cLogP (Wildman & Crippen, 1999); implemented in `medchem.complexity.ComplexityFilter`.
- **NIBR** (Novartis hit-triage substructure filters (Schuffenhauer et al., 2020)): Applies filters which annotates matches with severity and flag potential covalent motifs or special chemotypes (e.g., nitro counts, polyhalogenated aromatics, phenol esters); implemented in `medchem.structural.NIBRFilters`.
- **Bredt** (anti-Bredt bridgehead alkenes (Fawcett, 1950)): Flags alkenes—double bonds at bridgeheads in small bridged rings—indicative of unstable, non-planar  $\pi$  systems; implemented in `medchem.functional.bredt_filter`.

Table 8: Comparison of unconditional molecular generators by structural filters pass rates

| Rule set /Model     | E(3)DM      | HIERGRAPHVAE | JT-VAE      | MoLER       | MOLGPT      | TGM-DLM     |
|---------------------|-------------|--------------|-------------|-------------|-------------|-------------|
| <b>Pass Stage 1</b> | <b>3520</b> | <b>3579</b>  | <b>7586</b> | <b>3193</b> | <b>3474</b> | <b>1216</b> |
| Common Alerts       | 170         | 1212         | 3020        | 748         | 1114        | 119         |
| MolGraph statistics | 3491        | 3579         | 7584        | 3193        | 3468        | 1213        |
| MolComplexity       | 1130        | 3512         | 6955        | 3084        | 3212        | 1009        |
| NIBR                | 2226        | 3438         | 7333        | 2991        | 3325        | 945         |
| Bredt               | 3329        | 3574         | 7585        | 3113        | 3465        | 1198        |
| <b>Pass Stage 2</b> | <b>75</b>   | <b>1176</b>  | <b>2765</b> | <b>718</b>  | <b>1029</b> | <b>100</b>  |

Table 9: Comparison of ligand-based molecular generators by structural filters pass rates

| Rule set /Model     | GCPG        | GENTRL      | MOLFINDER   | PGMG       | REINVENT4 (V) | REINVENT4 (P) | REINVENT4 (TL) |
|---------------------|-------------|-------------|-------------|------------|---------------|---------------|----------------|
| <b>Pass Stage 1</b> | <b>6616</b> | <b>5669</b> | <b>1592</b> | <b>195</b> | <b>4089</b>   | <b>936</b>    | <b>1204</b>    |
| Common Alerts       | 4751        | 2001        | 509         | 49         | 1406          | 707           | 439            |
| MolGraph statistics | 6591        | 5668        | 1558        | 195        | 4088          | 936           | 1204           |
| MolComplexity       | 5832        | 5432        | 1046        | 134        | 3876          | 780           | 1153           |
| NIBR                | 6596        | 5448        | 1363        | 182        | 3923          | 936           | 1043           |
| Bredt               | 6616        | 5662        | 1529        | 185        | 4086          | 926           | 1203           |
| <b>Pass Stage 2</b> | <b>4168</b> | <b>1925</b> | <b>366</b>  | <b>37</b>  | <b>1325</b>   | <b>593</b>    | <b>413</b>     |

Table 10: Comparison of protein-based molecular generators by structural filters pass rates

| Rule set /Model     | DIFFSBDD    | DRAGONFLY   | DRAGONFLY (B) | DRUGFLOW    | POCKET2MOL  | PROTOBIND-DIFF | RESGEN      | TARGETDIFF  |
|---------------------|-------------|-------------|---------------|-------------|-------------|----------------|-------------|-------------|
| <b>Pass Stage 1</b> | <b>3665</b> | <b>2779</b> | <b>1022</b>   | <b>5464</b> | <b>2657</b> | <b>1466</b>    | <b>1080</b> | <b>3444</b> |
| Common Alerts       | 335         | 1501        | 321           | 1557        | 800         | 205            | 275         | 445         |
| MolGraph statistics | 3530        | 2779        | 1020          | 5442        | 2657        | 1459           | 1080        | 3444        |
| MolComplexity       | 1524        | 2698        | 960           | 4977        | 2273        | 1423           | 995         | 961         |
| NIBR                | 2871        | 2766        | 453           | 5141        | 2457        | 1446           | 889         | 3043        |
| Bredt               | 3403        | 2778        | 1019          | 5449        | 2638        | 1463           | 1063        | 3227        |
| <b>Pass Stage 2</b> | <b>197</b>  | <b>1459</b> | <b>218</b>    | <b>1392</b> | <b>682</b>  | <b>195</b>     | <b>255</b>  | <b>136</b>  |

### B.3 SYNTHESIS FEASIBILITY DEFINITIONS AND THRESHOLDS

The Synthetic Accessibility score (SA score) (Ertl & Schuffenhauer, 2009) is a heuristic fragment and complexity-based score that ranges molecules from 1 (easy) to 10 (hard). The original paper

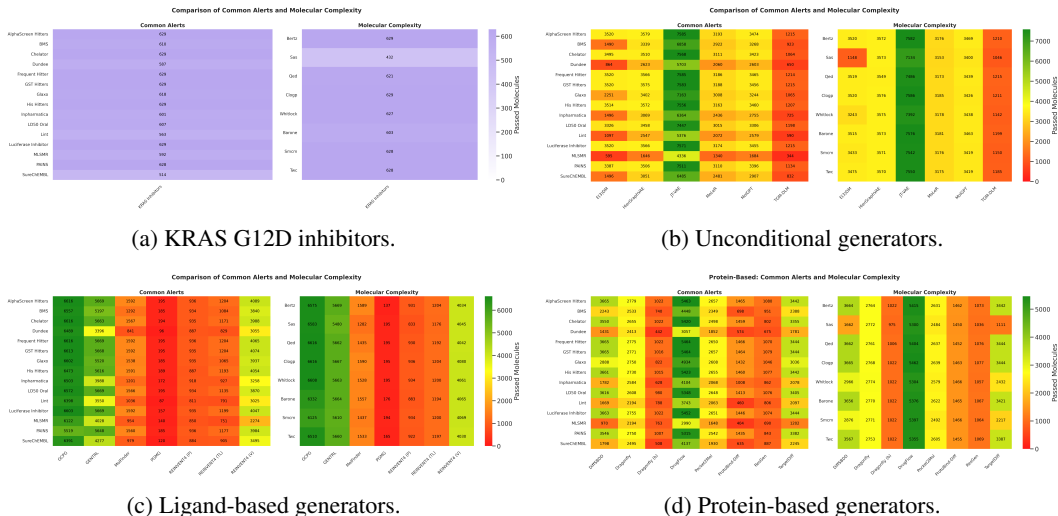

Figure 4: Passing rates of Structural Filters across the three model families and known KRAS G12D inhibitors. Each panel shows rates of molecules passed each rule subset in composition filters Common Alerts and MolComplexity of different generative approaches.

suggested SA score cutoff of 6.0; later comparative studies show the nominal cutoff can be permissive and that stricter boundary better match retrosynthesis-aware classifiers (Voršilák et al., 2020; Chen & Jung, 2024). Consequently, we set a threshold to  $\leq 4.5$  for SA score.

The Retrosynthetic Accessibility score (RA score) (Thakkar et al., 2021) is a machine-learned classifier that predicts whether an automated retrosynthesis planner is able to find a synthetic route for a molecule; it outputs a probability-like score. We use the natural decision cutoff of  $> 0.5$ , i.e., the model predicts that a retrosynthetic route is likely to be found.

Synthetic Bayesian Accessibility (SYBA) (Voršilák et al., 2020) is a fragment-based Bernoulli Naive Bayes classifier that assigns a continuous SYBA score. By construction, a positive SYBA score indicates the model classifies the compound as easy to synthesize, while a negative score indicates hard to synthesize molecule. With that knowledge we set SYBA threshold to  $> 0$ .

We configured AiZynthFinder (Genheden et al., 2020) (version 4.3.2) for synthesis planning to use the Monte Carlo Tree Search (MCTS) algorithm, the default template-based single-step retrosynthesis model included in the software, and the default ZINC-based set of building blocks. We chose the exploration constant (C) for MCTS to be 1.4, enabled priors with a default value of 0.5, activated cycle pruning to avoid redundant branches, and used the state score as the reward function. We constrained the search to a maximum depth of five transformations, no more than 10,000 algorithm iterations, and no more than 300 seconds for building the retrosynthesis tree. We chose such a small time limit to emulate the setting of high-throughput synthesizability screening in which the filtering of generated molecules should be fast. To prevent trivial solutions, we excluded the target molecule from the stock.

A molecule passes the Synthesis Feasibility stage only if it satisfies all four synthesizability thresholds simultaneously.

Table 11: Comparison of unconditional molecular generators by synthesis feasibility pass rates

| Metric /Model       | Threshold           | E(3)DM    | HIERGRAPHVAE | JT-VAE      | MoLER      | MOLGPT      | TGM-DLM    |
|---------------------|---------------------|-----------|--------------|-------------|------------|-------------|------------|
| <b>Pass Stage 2</b> |                     | <b>75</b> | <b>1176</b>  | <b>2765</b> | <b>718</b> | <b>1029</b> | <b>100</b> |
| SA score            | $\leq 4.5$          | 59        | 1174         | 2733        | 718        | 1026        | 100        |
| RA score            | $(0.5, 1]$          | 66        | 1149         | 2679        | 701        | 911         | 91         |
| SYBA score          | $(0, \infty)$       | 36        | 1153         | 2479        | 704        | 944         | 65         |
| AiZynthFinder       | <i>routes</i> $> 0$ | 0         | 987          | 1564        | 564        | 693         | 43         |
| <b>Pass Stage 3</b> |                     | <b>0</b>  | <b>975</b>   | <b>1549</b> | <b>557</b> | <b>679</b>  | <b>35</b>  |

Table 12: Comparison of unconditional molecular generators by synthesis feasibility pass rates

| Metric / Model      | Threshold     | GCPG        | GENTRL      | MOLFINDER  | PGMG      | REINVENT4 (V) | REINVENT4 (P) | REINVENT4 (TL) |
|---------------------|---------------|-------------|-------------|------------|-----------|---------------|---------------|----------------|
| <b>Pass Stage 2</b> |               | <b>4168</b> | <b>1925</b> | <b>366</b> | <b>37</b> | <b>1325</b>   | <b>593</b>    | <b>413</b>     |
| SA score            | $\leq 4.5$    | <b>4116</b> | 1912        | 366        | 37        | 1323          | 511           | 404            |
| RA score            | $(0.5, 1]$    | <b>3288</b> | 1792        | 363        | 24        | 1194          | 562           | 407            |
| SYBA score          | $(0, \infty)$ | <b>3087</b> | 1665        | 326        | 37        | 1293          | 466           | 377            |
| AIZynthFinder       | routes > 0    | <b>1312</b> | 318         | 268        | 24        | 940           | 299           | 285            |
| <b>Pass Stage 3</b> |               | <b>1064</b> | <b>303</b>  | <b>265</b> | <b>22</b> | <b>918</b>    | <b>222</b>    | <b>276</b>     |

Table 13: Comparison of unconditional molecular generators by synthesis feasibility pass rates

| Metric / Model      | Threshold     | DIFFSBDD   | DRAGONFLY   | DRAGONFLY (B) | DRUGFLOW    | POCKET2MOL | PROTOBIND-DIFF | RESGEN     | TARGETDIFF |
|---------------------|---------------|------------|-------------|---------------|-------------|------------|----------------|------------|------------|
| <b>Pass Stage 2</b> |               | <b>197</b> | <b>1459</b> | <b>218</b>    | <b>1392</b> | <b>682</b> | <b>195</b>     | <b>255</b> | <b>136</b> |
| SA score            | $\leq 4.5$    | 174        | <b>1459</b> | 217           | 1375        | 675        | 192            | 249        | 122        |
| RA score            | $(0.5, 1]$    | 122        | <b>1391</b> | 198           | 1188        | 535        | 185            | 211        | 68         |
| SYBA score          | $(0, \infty)$ | 99         | <b>1453</b> | 214           | 1202        | 508        | 192            | 189        | 42         |
| AIZynthFinder       | routes > 0    | 26         | <b>1220</b> | 38            | 466         | 151        | 103            | 67         | 6          |
| <b>Pass Stage 3</b> |               | <b>24</b>  | <b>1207</b> | <b>38</b>     | <b>453</b>  | <b>137</b> | <b>102</b>     | <b>62</b>  | <b>4</b>   |

Figure 5 shows synthesis paths found with AiZynthFinder for top three models. This figure extends Figure 2 from the main paper and shows the other 6 synthesis paths for unconditional, ligand-based and protein-based models.

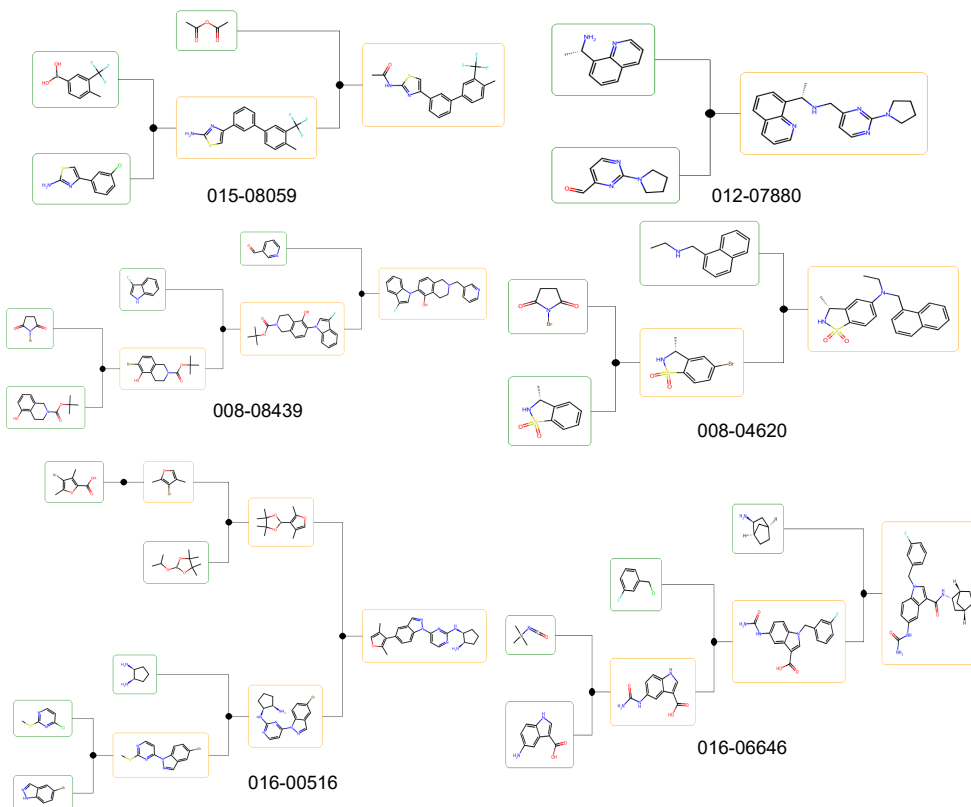

Figure 5: Top generated molecules among three families. Top: unconditional generators (015 - MolGPT, 012 - JT-VAE), middle: protein-based generators (008 - DrugFlow), bottom: ligand-based generators (016 - GCPG).

## B.4 DOCKING SCORE AND BINDING AFFINITY DEFINITIONS AND THRESHOLDS

We use *smina* (Koes et al., 2013) with box of size 10, centered at  $[-1.258, -12.520, 11.390]$ , *exhaustiveness* = 8, *num\_modes* = 9, *energy\_range* = 3; and GNINA (McNutt et al., 2021) with autobox centered on ligand TH-Z816, *exhaustiveness* = 8, *num\_modes* = 9.

We evaluate both *smina* and GNINA as *smina* is an empirical scoring and GNINA is a CNN-based ML scoring, using different scoring philosophies and thus different failure modes. A molecule that scores well in both engines is less likely to be a tool-specific false positive sample. We report intersection and union of the two resulted sets of molecules. Intersection gives high precision, and turns into a smaller set for costly follow-ups, and is good for manual medicinal chemists review and as a final shortlist.

Union with higher recall is useful for exploratory analyses and not discarding potentially good candidates too early.

Table 14: Comparison of unconditional molecular generators by docking and binding affinity estimation pass rates

| Tool /Model         | E(3)DM   | HIERGRAPHVAE | JT-VAE      | MoLER      | MOLGPT     | TGM-DLM   |
|---------------------|----------|--------------|-------------|------------|------------|-----------|
| <b>Pass Stage 3</b> | <b>0</b> | <b>975</b>   | <b>1549</b> | <b>557</b> | <b>679</b> | <b>35</b> |
| <i>smina</i>        | 0        | 906          | 1529        | 510        | 608        | 29        |
| GNINA               | 0        | 618          | 1083        | 380        | 463        | 15        |
| Boltz-2             | 0        | 742          | 1170        | 502        | 573        | 24        |
| <b>Pass Stage 4</b> | <b>0</b> | <b>477</b>   | <b>816</b>  | <b>323</b> | <b>340</b> | <b>10</b> |

Table 15: Comparison of ligand-based molecular generators by docking and binding affinity estimation pass rates

| Tool /Model         | GCPG        | GENTRL     | MOLFINDER  | PGMG      | REINVENT4 (V) | REINVENT4 (P) | REINVENT4 (TL) |
|---------------------|-------------|------------|------------|-----------|---------------|---------------|----------------|
| <b>Pass Stage 3</b> | <b>1064</b> | <b>303</b> | <b>265</b> | <b>22</b> | <b>918</b>    | <b>222</b>    | <b>276</b>     |
| <i>smina</i>        | 978         | 303        | 265        | 22        | 854           | 207           | 253            |
| GNINA               | 692         | 245        | 214        | 19        | 587           | 76            | 178            |
| Boltz-2             | 1064        | 293        | 246        | 22        | 844           | 210           | 263            |
| <b>Pass Stage 4</b> | <b>648</b>  | <b>238</b> | <b>200</b> | <b>19</b> | <b>518</b>    | <b>72</b>     | <b>164</b>     |

Table 16: Comparison of protein-based molecular generators by docking and binding affinity estimation pass rates

| Tool /Model         | DIFFSBDD  | DRAGONFLY   | DRAGONFLY (B) | DRUGFLOW   | POCKET2MOL | PROTOBIND-DIFF | RESGEN    | TARGETDIFF |
|---------------------|-----------|-------------|---------------|------------|------------|----------------|-----------|------------|
| <b>Pass Stage 3</b> | <b>24</b> | <b>1207</b> | <b>38</b>     | <b>453</b> | <b>137</b> | <b>102</b>     | <b>62</b> | <b>4</b>   |
| <i>smina</i>        | 24        | 884         | 22            | 448        | 137        | 96             | 55        | 4          |
| GNINA               | 20        | 767         | 22            | 395        | 95         | 70             | 42        | 4          |
| Boltz-2             | 13        | 1191        | 38            | 399        | 94         | 99             | 46        | 0          |
| <b>Pass Stage 4</b> | <b>13</b> | <b>575</b>  | <b>15</b>     | <b>344</b> | <b>69</b>  | <b>66</b>      | <b>37</b> | <b>0</b>   |

## C MODELS EVALUATION DETAILS

### C.1 INPUT DATA

The code is available at <https://anonymous.4open.science/r/MolGenBenchmark-F185/README.md>.

For conditional generation we have executed experiments on KRAS with the G12D oncogenic mutation - glycine-12 mutated to negatively charged aspartate. This is exploited by the design of TH-Z816 (switch-II pocket): the inhibitor has a piperazine moiety that forms a salt-bridge interaction with Asp12. Unlike G12C, which has a cysteine that can undergo covalent modification, G12D is harder to target. However, while generating molecules, the negative charge of Asp12 may be exploited by placing a positively charged group on the ligand. That gives specificity and a handle for binding.

For ligand-based models we have used a set of KRAS inhibitors provided by Ghazi Vakili et al. (2025). The initial set contains 645 molecules. We have checked the validity of molecules using RDKit (Landrum, 2013), and found 13 molecules with invalid structures (valence violation, prohibited symbols, etc). We filtered them out, leaving with 632 unique and valid molecules. Their statistics can be found in Figure 3a and Figure 4a. The structure binded with TH-Z816 is shown in Figure 6a and overall statistics on known inhibitors is shown in Figure 6b.

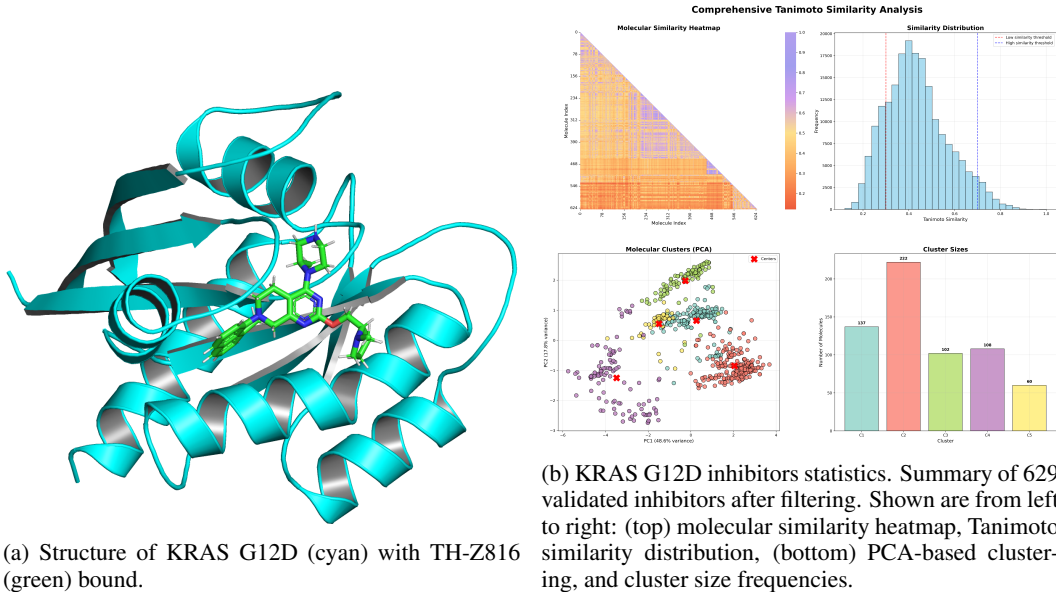

Figure 6: KRAS G12D binding with TH-Z816, and inhibitor set statistics.

## C.2 REINVENT4

We intentionally evaluated three REINVENT4 variants (vanilla, author-provided prior, and a KRAS-fine-tuned prior) to isolate how prior choice and transfer-learning within autoregressive SMILES models affect downstream utilities, as diversity, synthesizability, and docking. REINVENT4 was chosen for this ablation for three practical reasons: (i) it is a widely used, modular autoregressive framework with well-documented fine-tuning pipelines and accessible checkpoints, enabling controlled prior and fine-tuning experiments; (ii) prior and fine-tuning effect is known to be especially strong and therefore worth probing; and (iii) extending equivalent, rigorously comparable fine-tuning pipelines to every model family (graph VAEs, 3D diffusion, flow models) would require substantial architecture-specific engineering and hyperparameter sweeps beyond the scope of this benchmark. We therefore treat the three REINVENT4 variants as a sensitivity study of the autoregressive prior — not as an exhaustive evaluation of all possible transfer-learning strategies across architectures. All priors are listed on Löffler (2025), and open-source.

REINVENT4 (V) (Vanilla, checkpoint: `reinvent.prior`). The unmodified REINVENT4 prior provided by the authors. Prior was trained on ChEMBL data (Gaulton et al., 2012); sampling used the following settings: `temperature = 1.0`, `sample_strategy="beamsearch"`, `num_smiles = 500`; no additional constraints applied. We sampled 10,000 SMILES per run; `num_smiles` argument is the number of smiles to be sampled per 1 input SMILES. We input 629 KRAS G12D inhibitors to that prior, and got 49,119 SMILES utilizing one A100 40GB GPU in less than 8 hours, highlighting that though REINVENT4 (V) is fast but results in a small number of valid molecules ( $49,119 / (629 \times 500) \times 100\% = 15.618\%$ ).

REINVENT4 (P) (Provided prior, checkpoint: `mol2mol_medium_similarity.prior`). The REINVENT4 prior checkpoint provided by the authors that was trained with an explicit medium-Tanimoto similarity objective (author config: `similarity = 0.7`). Mol2Mol family priors were trained on PubChem data (Kim et al., 2023). In sake of fair comparison, we filtered known KRAS inhibitors with following strategy: if a molecule is present in Pubchem, we remove it. After filtering we resulted with 583 molecules, that were passed as input to REINVENT4 (P). Sampling used the



following settings: *temperature* = 1.0, *sample\_strategy*="beamsearch", *num\_smiles* = 500. We sampled 10,000 SMILES per run; as a result, we got 126,001 SMILES less than 8 hours with 43.225% of valid molecules ( $126,001 / (583 \times 500) \times 100\% = 43.25\%$ ).

REINVENT4 (TL) (Transfer-learned). We fine-tuned a REINVENT4 prior (*reinvent.prior*) on 583 known KRAS G12D inhibitors with Mol2Mol training pipeline. We defined a similarity threshold of 0.7, and trained on 1000 epochs for 72 hours utilizing one A100 40GB GPU. For evaluation, we picked 7 checkpoints from the training process: [3, 5, 10, 100, 200, 500, 1000]. We sampled 10,000 SMILES per run for each checkpoint, and calculated basic descriptors. Figure 7 shows the distribution of the descriptors for each checkpoint.

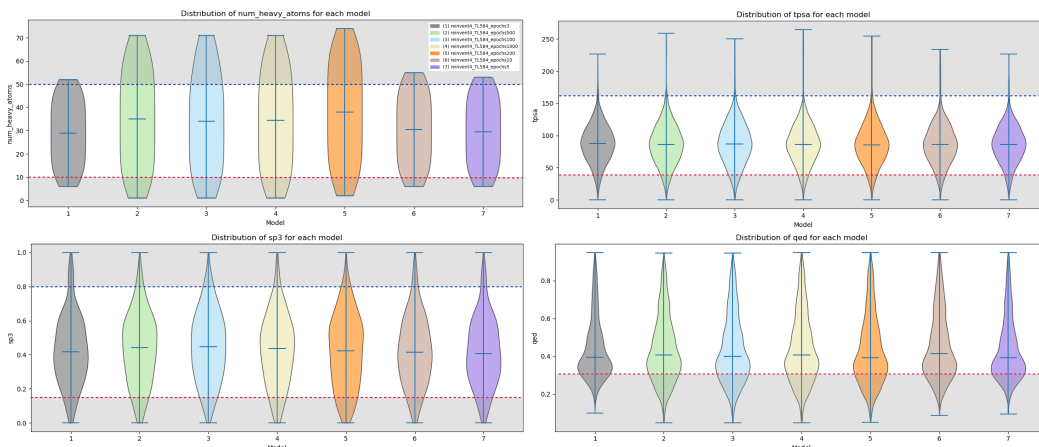

Figure 7: Distribution of basic descriptors for REINVENT4 (TL) checkpoints fine-tuned on 583 known KRAS G12D inhibitors.
